# Supplementary material for: Characterization of Alternaria and Colletotrichum Species Associated with Pomegranate (Punica granatum L.) in Maharashtra State of India
Source: MDPI journal article supplement (doi:10.3390/jof8101040), 2022-09-30
Supplement: s1 [file s1]

Supplementary figures:

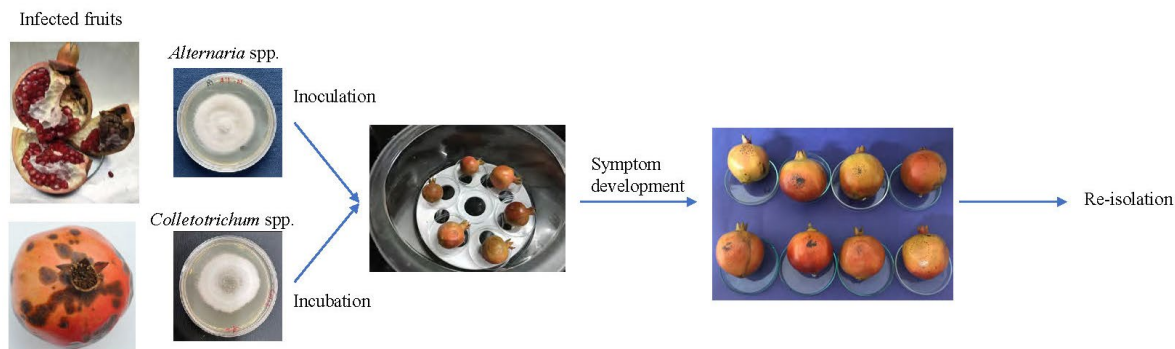

Figure S1. Flowchart depicting steps performed during pathogenicity tests

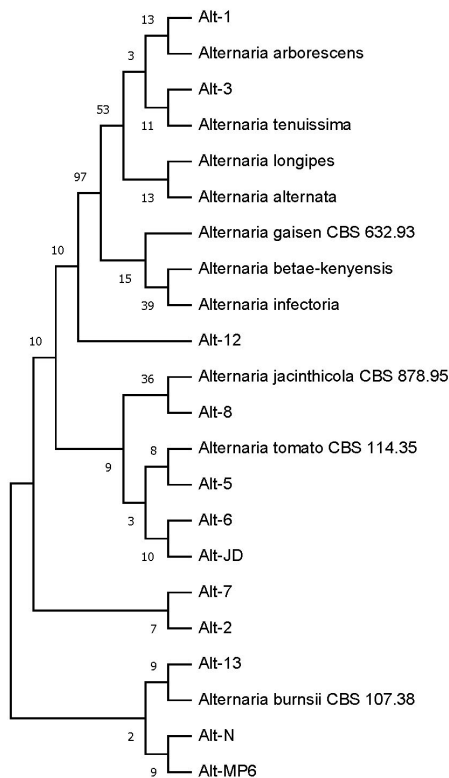

Figure S2. Phylogenetic analysis using elongation factor (*TEF-α*) gene amplified and sequenced from *Alternaria* isolates. Maximum Likelihood tree drawn using MEGA XI with 1000 bootstrap

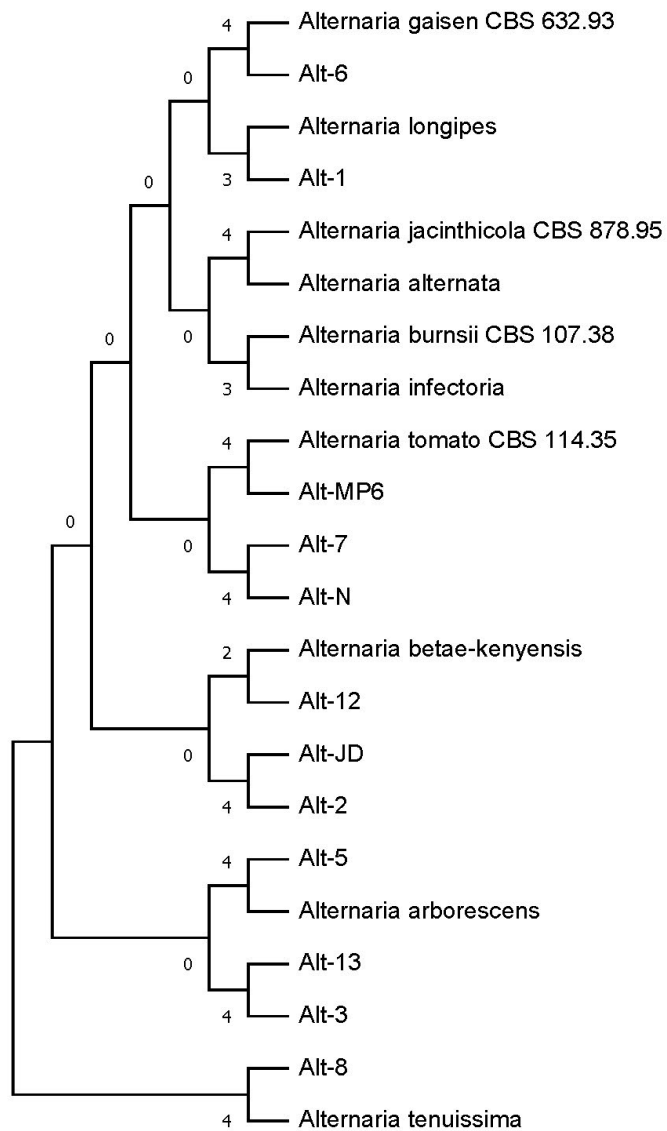

**Figure S3.** Phylogenetic analysis using *ITS* region amplified and sequenced from *Alternaria* isolates. Maximum Likelihood tree drawn using MEGA XI with 1000 bootstrap

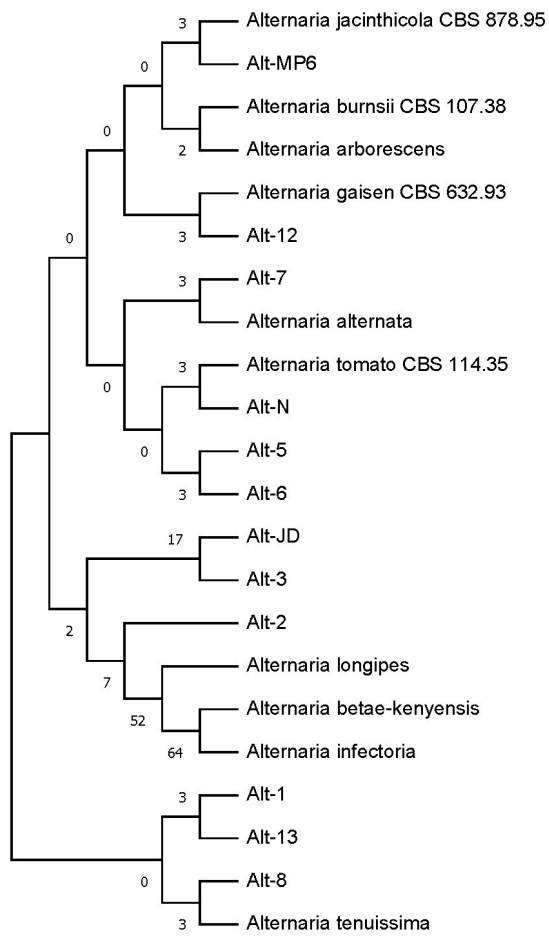

**Figure S4.** Phylogenetic analysis using nuclear ribosomal large subunit (LSU) region amplified and sequenced from *Alternaria* isolates. Maximum Likelihood tree drawn using MEGA XI with 1000 bootstrap
