# Supplementary material for: Characterization of Alternaria and Colletotrichum Species Associated with Pomegranate (Punica granatum L.) in Maharashtra State of India
Source: MDPI journal article supplement (doi:10.3390/jof8101040), 2022-09-30
Supplement: s1 [file s1]

**Supplementary Table S1.** Origin of isolates of *Alternaria* (n=12) and *Colletotrichum* (n=19) from pomegranate characterized in this study

| Isolate Name                          | Taluk & District     | Co-ordinates                      | State          | Year of collection | Source of isolation |
|---------------------------------------|----------------------|-----------------------------------|----------------|--------------------|---------------------|
| <b><i>Alternaria</i> isolates</b>     |                      |                                   |                |                    |                     |
| Alt-1                                 | Kanpur               | 26°19'97.053"N 79°84'41.634"E     | Uttar Pradesh  | 2016               | Leaf                |
| Alt-2                                 | Malshiras, Solapur   | 17°70'23.773"N 75°08'62.023"E     | Maharashtra    | 2016               | Fruit               |
| Alt-3                                 | Jalna, Aurangabad    | 19°50'07.875"N 75°58'64.147"E     | Maharashtra    | 2016               | Fruit               |
| Alt-5                                 | Mangalwedha, Solapur | 17°30'41.057"N 75°27'06.779"E     | Maharashtra    | 2017               | Fruit               |
| Alt-6                                 | Nanded               | 19°08'17"N 77°19'15"E             | Maharashtra    | 2019               | Fruit               |
| Alt-7                                 | Madha, Solapur       | 17°95'24.105"N 75°59'79.319"E     | Maharashtra    | 2019               | Fruit               |
| Alt-8                                 | Sangola, Solapur     | 17°20'68.107"N 75°00'60.615"E     | Maharashtra    | 2019               | Fruit               |
| Alt-12                                | Beed                 | 18°35'32.6"N 75°27'04.0"E         | Maharashtra    | 2020               | Fruit               |
| Alt-13                                | Sangola, Solapur     | 17°26'05.458"N 75°11'58.566"E     | Maharashtra    | 2020               | fruit               |
| Alt-JD                                | Parbhani             | 19°09'14.0"N 76°27'46.4"E         | Maharashtra    | 2021               | Fruit               |
| Alt-MP6                               | Chhindwara           | 22°89'59"N 77°75'78"E             | Madhya Pradesh | 2021               | Fruit               |
| Alt-N                                 | NRCP, Solapur        | 17°70'62.443"N 75°83'38.268"E     | Maharashtra    | 2021               | Fruit               |
| <b><i>Colletotrichum</i> isolates</b> |                      |                                   |                |                    |                     |
| Col-1                                 | Chitradurga          | 13°47'54.6936"N 76°17'06.2052"E   | Karnataka      | 2015               | fruit               |
| Col-2                                 | Solapur              | 17°53'55.014"N 74°45'15.0804"E    | Maharashtra    | 2015               | fruit               |
| Col-3                                 | Jalna                | 19°26'23.3448"N 75°55'24.3336"E   | Maharashtra    | 2015               | fruit               |
| Col-4                                 | Jalna                | 19°50'04.7976"N 75°52'53.8824"E   | Maharashtra    | 2015               | fruit               |
| Col-6                                 | Solapur              | 17°07'28.0164"N 74°11'14.622"E    | Maharashtra    | -                  | fruit               |
| Col-7                                 | Beed                 | 19°11'11.6628"N 76°13'29.0532"E   | Maharashtra    | 2015               | fruit               |
| Col-8                                 | Satara               | 18°02'30.1416"N 74°11'10.2552"E   | Maharashtra    | 2015               | fruit               |
| Col-9                                 | Nandubar             | N 21°21'51.5988"N 74°17'52.3968"E | Maharashtra    | 2015               | fruit               |
| Col-11                                | Selam                | N 11°07'37.6392"N 78°39'24.8184"E | Tamil Nadu     | 2015               | fruit               |
| Col-12                                | Solapur              | N 17°51'47.718"N 74°54'19.7244"E  | Maharashtra    | 2015               | fruit               |
| Col-13                                | Jalna                | N 19°50'04.7976"N 75°52'53.8824"E | Maharashtra    | 2016               | fruit               |
| Col-14                                | Solapur              | N 17°41'20.9616"N 75°48'20.9484"E | Maharashtra    | 2017               | fruit               |
| Col-15                                | Solapur              | N 17°33'55.3644"N 75°34'19.4304"E | Maharashtra    | 2017               | fruit               |

|        |                |                                   |             |      |       |
|--------|----------------|-----------------------------------|-------------|------|-------|
| Col-17 | Solapur        | N 17°39'35.7084"N 75°54'23.0076"E | Maharashtra | 2017 | fruit |
| Col-18 | Solapur        | N 17°51'47.718"N 74°54'19.7244"E  | Maharashtra | 2017 | fruit |
| Col-21 | Karnataka      | N 15°19'02.1972"N 75°42'49.9968"E | Karnataka   | 2018 | fruit |
| Col-25 | Solapur        | N 18°18'13.7952"N 75°09'58.3632"E | Maharashtra | 2019 | fruit |
| Col-26 | Hiraj, Solapur | N 17°41'20.9616"N 75°48'20.9484"E | Maharashtra | 2021 | fruit |
| Col-27 | Solapur        | N 17°39'35.7084"N 75°54'23.0076"E | Maharashtra | 2021 | fruit |

**Supplementary Table S2.** Morphotypes of *Alternaria* isolates (n=12) characterized in the current study. Front and back of 7-days- old colonies grown on PDA at 25°C.

| Isolate Name | Colony on PDA (obverse)                                                             | Colony on PDA (reverse)                                                             | Colony appearance on PDA at 25±1                                                                                             | Micrograph of conidia (40X)                                                           | Conidia shape |
|--------------|-------------------------------------------------------------------------------------|-------------------------------------------------------------------------------------|------------------------------------------------------------------------------------------------------------------------------|---------------------------------------------------------------------------------------|---------------|
| Morphotype I |                                                                                     |                                                                                     |                                                                                                                              |                                                                                       |               |
| Alt-1        |   |   | Greyish white on obverse and on reverse, the inner part was dark brown and the margin was brownish white                     |   | Ovoid         |
| Alt-3        |  |  | Greyish white with white margin on obverse and on reverse, the innermost part was dark brown and the outer part was brownish |  | Ovoid         |

---

Alt-5

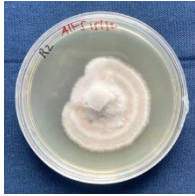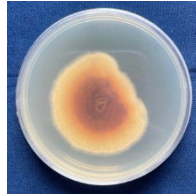

Greyish white on obverse and on reverse, the inner part was dark brown and the outer part was brownish with white margin

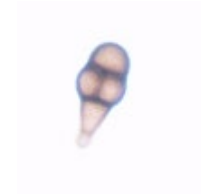

Ovoid

Alt-6

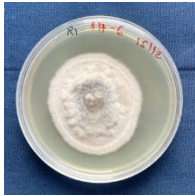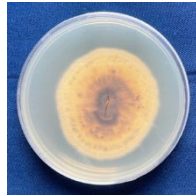

Light grey on obverse and on reverse, the inner part was dark brown and the outer part was light brown with white margin

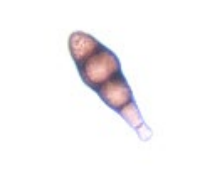

Ovoid

Alt-7

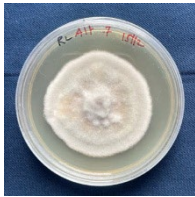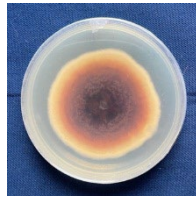

Greyish white on obverse and on reverse, dark brown with brownish white margin

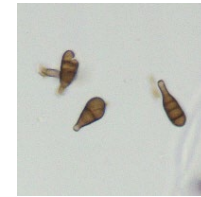

Ovoid

Alt-8

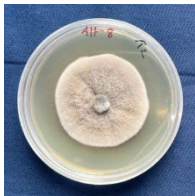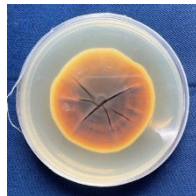

Grey with white margin on obverse and on reverse dark brown with white margin

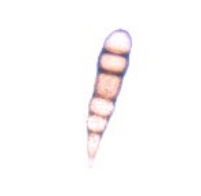

Obclavate

---

---

Alt-JD

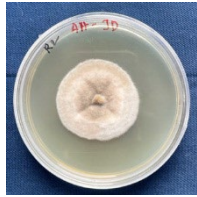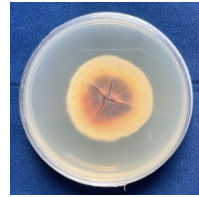

Greyish white on obverse and on reverse, the inner part was dark brown and the margin was brownish white

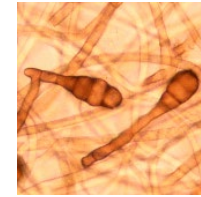

Ovoid

Alt-N

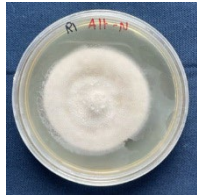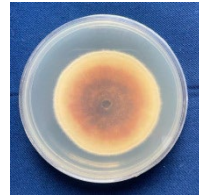

Greyish white on obverse and in reverse, the inner part was dark brown and the margin was brownish white

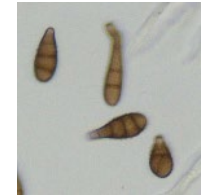

Ovoid

### Morphotype II

Alt-12

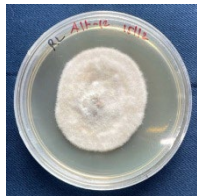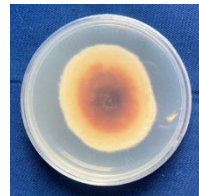

Dull white on obverse and on reverse brown with brownish white margin

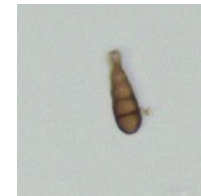

Ovoid

Alt-13

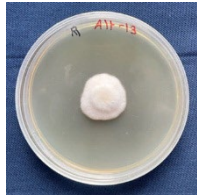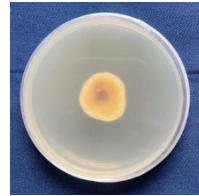

White on obverse and on reverse light brownish with white margin

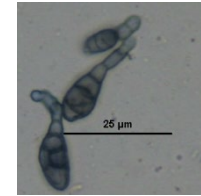

Obclavate

### Morphotype III

---

|         |                                                                                   |                                                                                   |                                                                                                                    |                                                                                     |       |
|---------|-----------------------------------------------------------------------------------|-----------------------------------------------------------------------------------|--------------------------------------------------------------------------------------------------------------------|-------------------------------------------------------------------------------------|-------|
| Alt-2   |  |  | Brownish on obverse and on reverse light brown colour with white margin                                            |  | Ovoid |
| Alt-MP6 |  |  | Light brownish on obverse with white margin and in reverse the inner part was brown and outer part was light brown |  | Ovoid |

**Supplementary Table S3.** Morphotypes of *Colletotrichum* isolates (n=19) characterized in the current study. Front and back of 7-days- old colonies grown on PDA at 25°C.

| Isolate Name | Colony on PDA (obverse)                                                             | Colony on PDA (reverse)                                                             | Colony appearance on PDA at 25±1                          | Micrograph of Conidia (40X)                                                           | Conidia shape                   |
|--------------|-------------------------------------------------------------------------------------|-------------------------------------------------------------------------------------|-----------------------------------------------------------|---------------------------------------------------------------------------------------|---------------------------------|
| Morphotype I |                                                                                     |                                                                                     |                                                           |                                                                                       |                                 |
| Col-1        |  |  | Fluffy white colonies with regular margin, reverse yellow |  | Cylindric, rounded at both ends |

---

Col-4

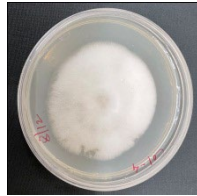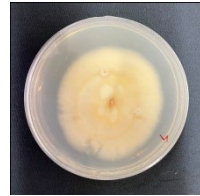

Fluffy white colonies with regular margin, reverse pale yellow

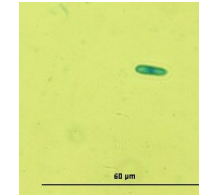

Cylindric, pointed at one end

Col-11

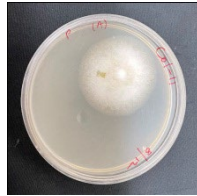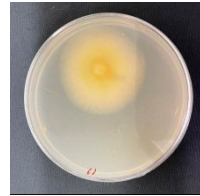

White to pale orange with regular margin, reverse pale orange

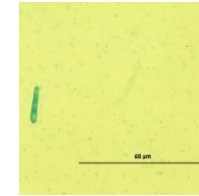

Cylindric, rounded at both ends

Col-18

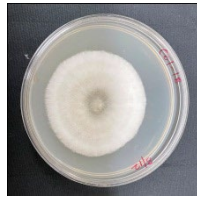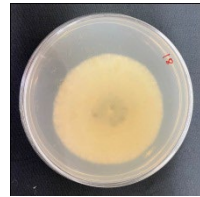

White colonies with regular margin, reverse pale yellow

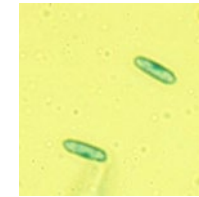

Cylindric, rounded at both ends

Col-21

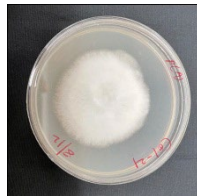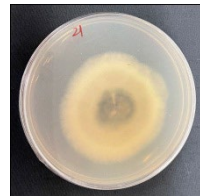

White colonies with regular margin, reverse pale orange

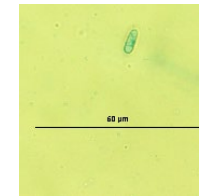

Cylindric, pointed at one end

Morphotype II

---



---

Col-2

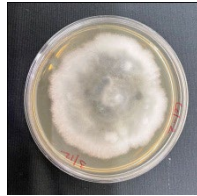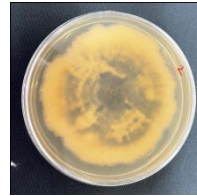

Grey in the middle with whitish irregular margin, reverse greyish yellow

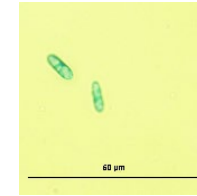

Cylindric, rounded at both ends

Col-3

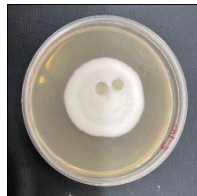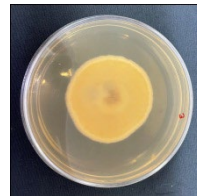

Grey in the middle with whitish regular margin, reverse greyish yellow

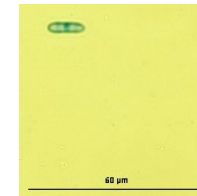

Cylindric, rounded at both ends

Col-6

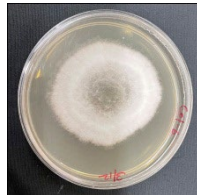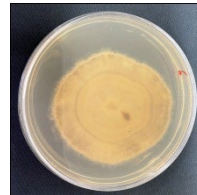

Grey in the middle with whitish regular margin, reverse greyish yellow

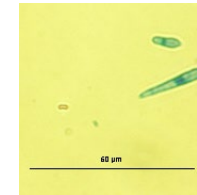

Cylindric, pointed at one end

Col-7

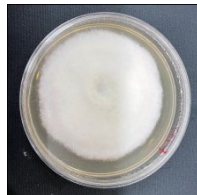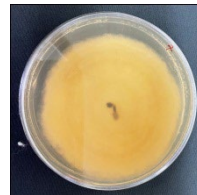

Grey in the middle with whitish regular margin, reverse yellow

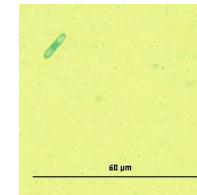

Cylindric, pointed at one end

---

---

Col-8

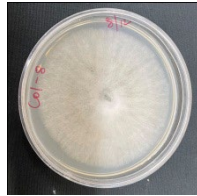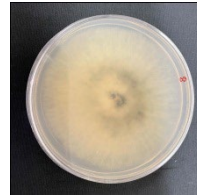

Grey white with regular margin,  
reverse yellowish brown

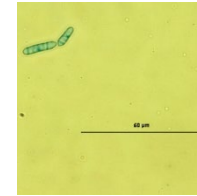

Cylindric pointed at one  
end

Col-9

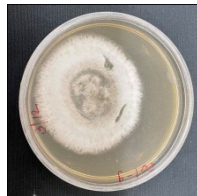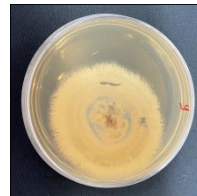

Grey in the middle with whitish  
regular margin, reverse greyish  
yellow

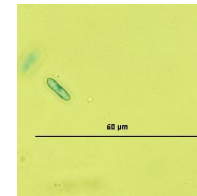

Cylindric, rounded at  
both ends

Col-12

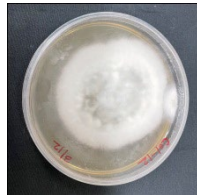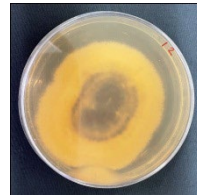

Grey in the middle with whitish  
regular margin, reverse greyish  
yellow

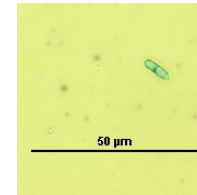

Cylindric, rounded at  
both ends

Col-13

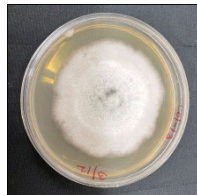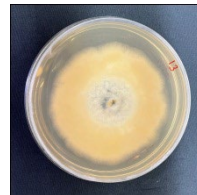

Grey in the middle with whitish  
irregular margin, reverse greyish  
yellow

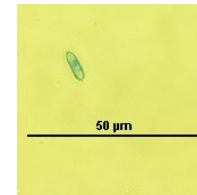

Cylindric, rounded at  
both ends

---



---

Col-14

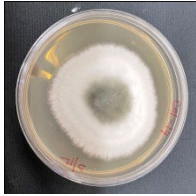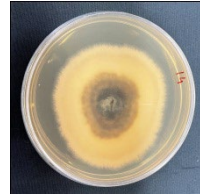

Grey in the middle with whitish regular margin, reverse greyish yellow

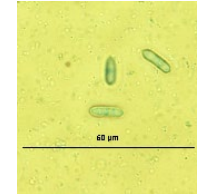

Cylindric, rounded at both ends

Col-15

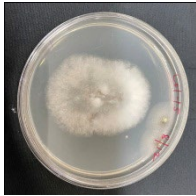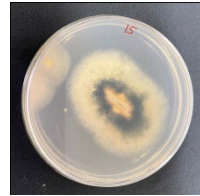

Pale to dark grey with regular margin, reverse yellowish brown

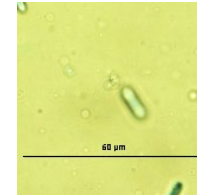

Cylindric, rounded at both ends

Col-17

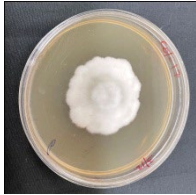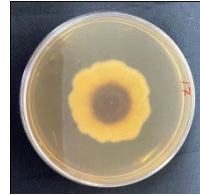

Grey in the middle with whitish irregular margin, reverse greyish yellow

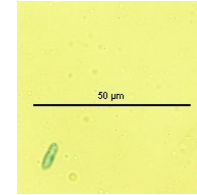

Cylindric, rounded at both ends

Col-25

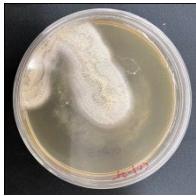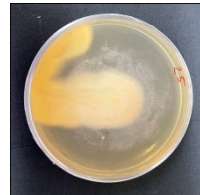

Grey in the middle with whitish irregular margin, reverse greyish yellow

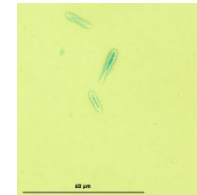

Cylindric, rounded at both ends

---

Col-26

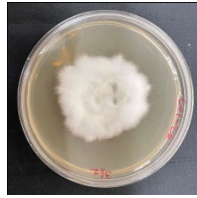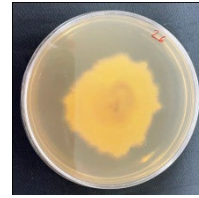

Grey in the middle with whitish irregular margin, reverse greyish yellow

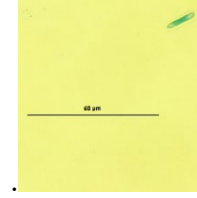

Cylindric, pointed at one end

Col-27

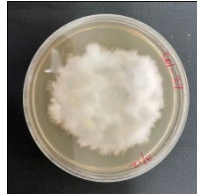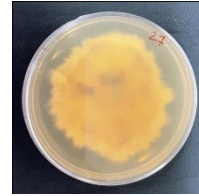

Grey in the middle with whitish irregular margin, reverse greyish yellow

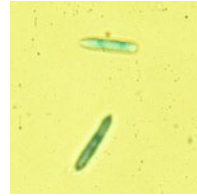

Cylindric, pointed at one end

**Supplementary Table S4.** Microscopic features of conidia produced by different isolates (n=12) of *Alternaria* characterized in this study.

| Isolate Name | Length*    | Width*    | Beak length* | Length/Width Ratio | Vertical septa | Horizontal septa | Vertical septa / Horizontal septa Ratio |
|--------------|------------|-----------|--------------|--------------------|----------------|------------------|-----------------------------------------|
| Alt-1        | 15.51±2.65 | 5.96±0.47 | 5.7±0.77     | 2.64±0.64          | 3.8±0.74       | 0.6±0.48         | 2.2±1.83                                |
| Alt-12       | 11.98±2.32 | 5.94±0.53 | 4.05±1.25    | 2.04±0.47          | 3.2±0.4        | 0.2±0.4          | 0.6±1.2                                 |
| Alt-13       | 17.21±2.04 | 6.69±0.93 | 8.61±1.35    | 2.47±0.11          | 2.8±0.74       | 0.4±0.48         | 1.4±1.74                                |
| Alt-2        | 10.44±0.78 | 5.4±0.93  | 4.3±0.95     | 1.97±0.24          | 2.8±0.4        | 0.2±0.4          | 0.4±0.8                                 |
| Alt-3        | 13.99±1.64 | 5.3±0.45  | 5.53±1.15    | 2.61±0.30          | 3.2±0.4        | 0                | 0                                       |
| Alt-5        | 12.96±0.95 | 5.3±0.51  | 5.22±1.21    | 2.43±0.12          | 2.6±0.8        | 0                | 0                                       |
| Alt-6        | 11.68±1.27 | 5.03±0.59 | 5.94±0.89    | 2.23±0.33          | 2.2±0.4        | 0.2±0.4          | 0.4±0.8                                 |
| Alt-7        | 11.36±1.76 | 5.42±0.38 | 3.73±0.59    | 2.11±0.41          | 2.2±0.74       | 0                | 0                                       |
| Alt-8        | 27.24±1.58 | 7.37±1.16 | 7.97±0.43    | 3.77±0.56          | 5±0.89         | 0.2±0.4          | 0.8±1.6                                 |
| Alt-JD       | 23.36±4.94 | 8.12±3.00 | 8.82±2.62    | 3.27±1.22          | 4.2±1.16       | 0                | 0                                       |

|         |            |           |           |           |          |          |          |
|---------|------------|-----------|-----------|-----------|----------|----------|----------|
| Alt-MP6 | 16.92±3.46 | 7.65±0.68 | 8.09±1.66 | 2.23±0.52 | 3.8±1.16 | 0.8±0.74 | 1.9±1.85 |
| Alt-N   | 11.01±1.07 | 5.8±0.87  | 4.9±1.30  | 1.91±0.11 | 2.2±0.4  | 0.2±0.4  | 0.4±0.8  |

<sup>a</sup>Mean of 5 replicates ± SD. \*Length and width measurements are in µm

**Supplementary Table S5.** Microscopic features of conidia produced by different isolates (n=19) of *Colletotrichum* characterized in this study.

| Isolate Name | Average conidial length* ± SD | Average conidial width* ± SD | Length/Width Ratio ±SD |
|--------------|-------------------------------|------------------------------|------------------------|
| 1. Col-1     | 10.56±1.65                    | 2.8±0.30                     | 3.78±0.53              |
| 2. Col-2     | 11.78±2.70                    | 3.02±0.62                    | 3.89±0.45              |
| 3. Col-3     | 9.06±0.95                     | 3.20±0.33                    | 2.84±0.33              |
| 4. Col-4     | 8.9±1.13                      | 2.634±0.32                   | 3.41±0.69              |
| 5. Col-6     | 17±4.88                       | 3.271±0.34                   | 5.15±1.30              |
| 6. Col-7     | 11.18±1.30                    | .33±0.23                     | 4.83±0.64              |
| 7. Col-8     | 11.20±3.60                    | 2.88±0.66                    | 4.15±1.67              |
| 8. Col-9     | 13.51±5.43                    | 2.94±0.37                    | 4.80±2.42              |
| 9. Col-11    | 9.15±1.88                     | 2.585±0.58                   | 3.85±1.71              |
| 10. Col-12   | 11.06±2.78                    | 2.88±0.35                    | 3.86±0.91              |
| 11. Col-13   | 8.6±0.48                      | 3.07±0.38                    | 2.86±0.54              |
| 12. Col-14   | 9.78±3.51                     | 2.9±0.23                     | 3.65±0.69              |
| 13. Col-15   | 9.54±1.74                     | 2.94±0.32                    | 3.42±0.70              |
| 14. Col-17   | 11.02±2.06                    | 2.1±0.46                     | 5.31±1.36              |
| 15. Col-18   | 9.54±1.37                     | 2.869±0.44                   | 3.40±0.63              |
| 16. Col-21   | 7.92±1.19                     | 2.98±0.51                    | 2.77±0.52              |
| 17. Col-25   | 10.05±1.45                    | 2.4±0.29                     | 4.06±4.94              |
| 18. Col-26   | 11.19±1.91                    | 2.8±0.40                     | 4.00±1.15              |
| 19. Col-27   | 8.68±0.41                     | 3.1±0.81                     | 2.79±0.51              |

<sup>a</sup>Mean of 5 replicates ± SD. \*Length and width measurements are in µm
