# Supplementary figures and images for: Characterization of Alternaria and Colletotrichum Species Associated with Pomegranate (Punica granatum L.) in Maharashtra State of India
Source: MDPI journal article supplement (doi:10.3390/jof8101040), 2022-09-30

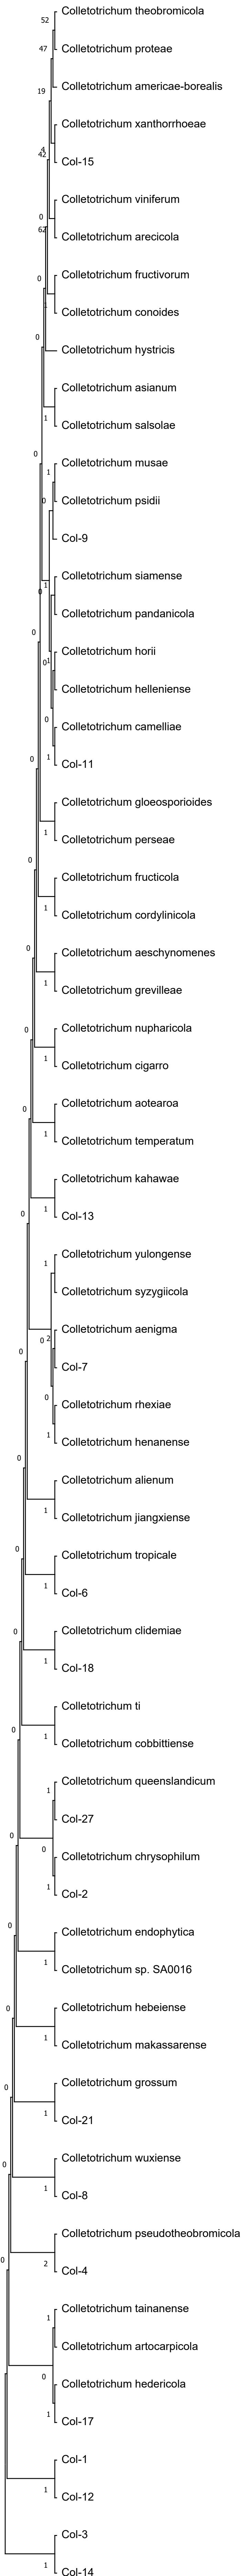

Supplement: s1 [file s1]

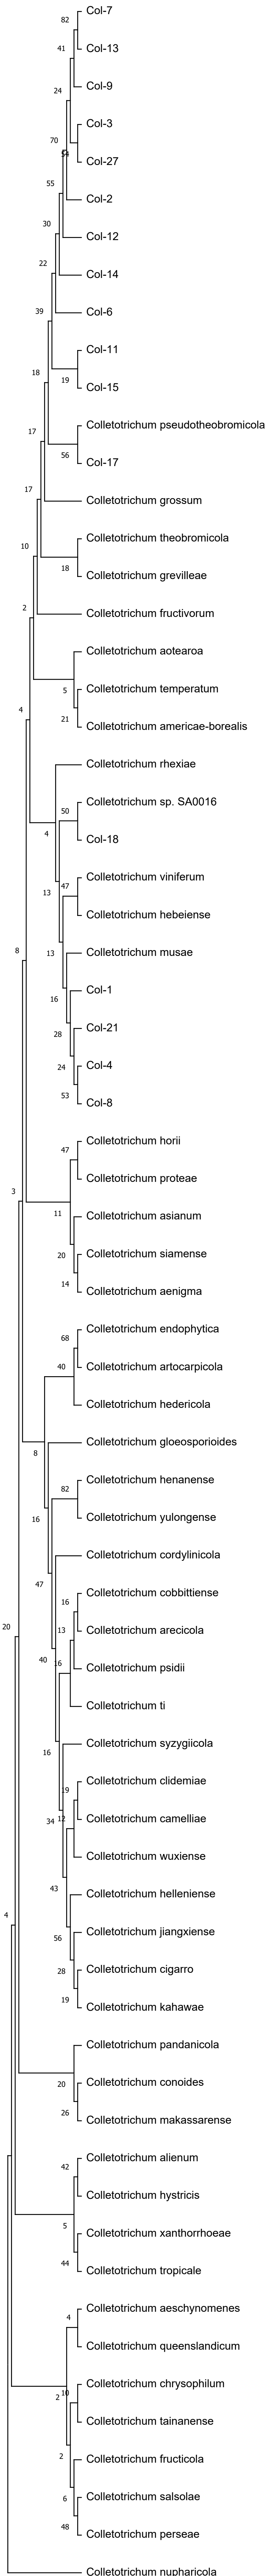

Supplement: s1 [file s1]

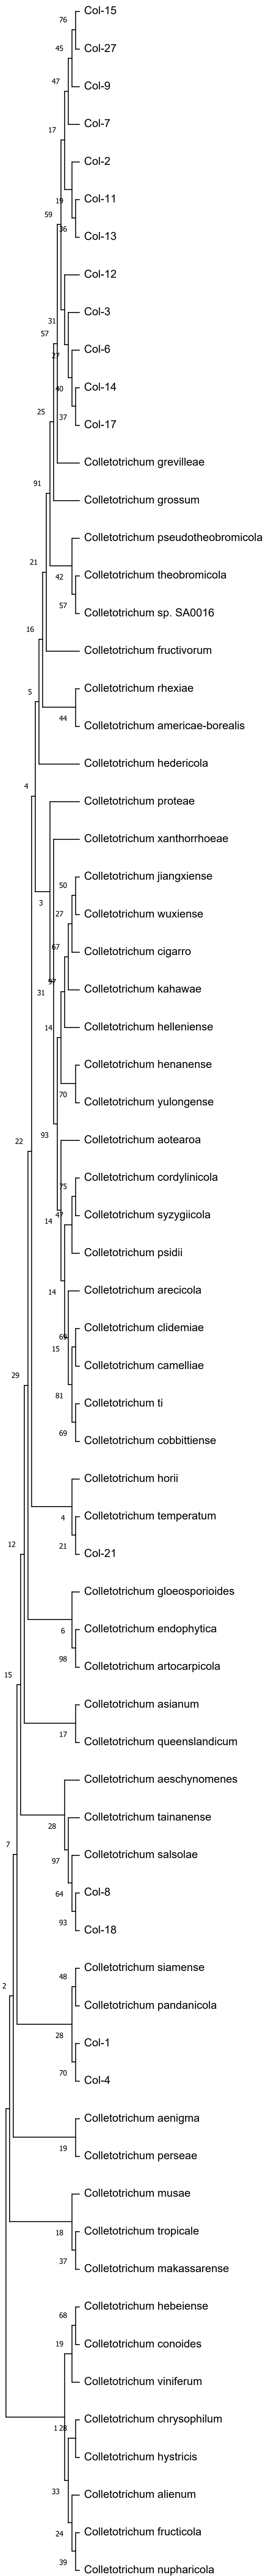

Supplement: s1 [file s1]
